# Supplementary material for: Effects of a comprehensive brain computed tomography deep-learning model on radiologist detection accuracy: a multireader, multicase study
Source: Research Square preprint supplement (doi:10.21203/rs.3.rs-1588540/v1), 2022-05-05
Supplement: Supplementary file 1 [file 45ba0f8ac4333759f33ba7f0.docx]

# Supplementary Information

Supplementary Tables

Supplementary Table 1: Performance of the standalone model, unaided radiologists and aided radiologists reported as mean AUC for the 189 Ontology Tree Child Findings

| **Finding (Leaf ID)** | **Standalone Model** | | **Radiologist Unaided** | | | **Radiologist Aided** | |
| --- | --- | --- | --- | --- | --- | --- | --- |
| **Mean AUC** | **95% CI** | **Mean AUC** | **95% CI** | **Mean AUC** | | **95% CI** | |
| abnormal_prominent_vessels | 0.77 | (0.68 - 0.85) | 0.55 | (0.52 - 0.59) | 0.55 | | (0.52 - 0.58) | |
| acute_haemorrhagic_infarct | 0.99 | (0.98 - 1) | 0.75 | (0.68 - 0.81) | 0.83 | | (0.78 - 0.88) | |
| acute_infarct | 0.93 | (0.9 - 0.94) | 0.71 | (0.68 - 0.74) | 0.82 | | (0.79 - 0.84) | |
| acute_infarct_petechial | 0.97 | (0.95 - 0.98) | 0.60 | (0.57 - 0.64) | 0.73 | | (0.67 - 0.78) | |
| acute_intraparenchymal_haemorrhage | 0.98 | (0.98 - 0.99) | 0.84 | (0.8 - 0.87) | 0.91 | | (0.88 - 0.94) | |
| acute_lacunar_infarct | 0.85 | (0.81 - 0.89) | 0.57 | (0.55 - 0.6) | 0.59 | | (0.56 - 0.62) | |
| acute_on_chronic_subdural_haematoma | 0.99 | (0.99 - 1) | 0.72 | (0.68 - 0.77) | 0.83 | | (0.79 - 0.88) | |
| acute_subdural_haematoma | 0.97 | (0.96 - 0.98) | 0.77 | (0.74 - 0.8) | 0.89 | | (0.86 - 0.91) | |
| agenesis_corpus_callosum | 0.99 | (0.98 - 1) | 0.78 | (0.74 - 0.82) | 0.82 | | (0.78 - 0.86) | |
| aggressive_lesion_jaw | Not included | | 0.59 | (0.55 - 0.63) | 0.58 | | (0.54 - 0.61) | |
| aggressive_lytic_lesion_calvarial | 0.95 | (0.91 - 0.98) | 0.78 | (0.73 - 0.82) | 0.82 | | (0.77 - 0.87) | |
| aggressive_meningeal_thickening | 0.91 | (0.87 - 0.94) | 0.56 | (0.53 - 0.59) | 0.59 | | (0.55 - 0.63) | |
| aggressive_mixed_lesion_calvarial | 0.86 | (0.8 - 0.91) | 0.64 | (0.61 - 0.68) | 0.59 | | (0.56 - 0.62) | |
| aggressive_sclerotic_lesion_calvarial | Not included | | 0.66 | (0.61 - 0.7) | 0.66 | | (0.61 - 0.71) | |
| aggressive_skin_lesion | 0.95 | (0.91 - 0.97) | 0.70 | (0.65 - 0.74) | 0.76 | | (0.71 - 0.81) | |
| aneurysm | 0.82 | (0.74 - 0.88) | 0.59 | (0.56 - 0.63) | 0.66 | | (0.61 - 0.72) | |
| aneurysm_coils | 1.00 | (1 - 1) | 0.95 | (0.93 - 0.98) | 0.97 | | (0.94 - 0.99) | |
| atlanto_axial_subluxation | Not included | | 0.54 | (0.52 - 0.57) | 0.52 | | (0.5 - 0.54) | |
| atlanto_occipital_dissociation | Not included | | 0.56 | (0.48 - 0.64) | 0.56 | | (0.49 - 0.62) | |
| basal_cistern_effacement | 0.97 | (0.96 - 0.98) | 0.61 | (0.58 - 0.63) | 0.78 | | (0.75 - 0.81) | |
| basal_ganglia_calcification | 0.96 | (0.95 - 0.98) | 0.75 | (0.71 - 0.79) | 0.81 | | (0.77 - 0.85) | |
| basilar_thrombosis | Not included | | 0.55 | (0.51 - 0.59) | 0.53 | | (0.5 - 0.55) | |
| beam_hardening_artefact | 0.79 | (0.76 - 0.82) | 0.53 | (0.51 - 0.54) | 0.56 | | (0.54 - 0.58) | |
| benign_facial_bone_lesion | Not included | | 0.52 | (0.51 - 0.53) | 0.52 | | (0.51 - 0.53) | |
| benign_meningeal_thickening | 0.90 | (0.83 - 0.97) | 0.51 | (0.5 - 0.52) | 0.51 | | (0.5 - 0.52) | |
| benign_soft_tissue_mass_neck | Not included | | 0.55 | (0.52 - 0.57) | 0.56 | | (0.53 - 0.58) | |
| brainstem_atrophy | Not included | | 0.58 | (0.55 - 0.62) | 0.55 | | (0.53 - 0.58) | |
| brainstem_infarct | 0.80 | (0.73 - 0.87) | 0.53 | (0.51 - 0.55) | 0.54 | | (0.52 - 0.57) | |
| calvarial_thickening | 0.97 | (0.95 - 0.99) | 0.69 | (0.64 - 0.73) | 0.67 | | (0.63 - 0.72) | |
| cavum_septum_pellucidum | 0.75 | (0.69 - 0.8) | 0.65 | (0.61 - 0.69) | 0.62 | | (0.59 - 0.66) | |
| cerebellar_agenesis | 0.92 | (0.9 - 0.94) | 0.76 | (0.71 - 0.81) | 0.65 | | (0.6 - 0.7) | |
| cerebellar_atrophy | 0.91 | (0.87 - 0.95) | 0.61 | (0.59 - 0.64) | 0.67 | | (0.65 - 0.7) | |
| cerebellar_infarct | Not included | | 0.66 | (0.61 - 0.7) | 0.73 | | (0.67 - 0.78) | |
| cerebral_atrophy | 0.88 | (0.86 - 0.9) | 0.61 | (0.58 - 0.63) | 0.66 | | (0.63 - 0.68) | |
| cerebral_convexity_subarachnoid_haemorrhage | 0.96 | (0.94 - 0.98) | 0.76 | (0.72 - 0.79) | 0.89 | | (0.86 - 0.91) | |
| chiari_1 | 0.98 | (0.97 - 0.99) | 0.68 | (0.63 - 0.73) | 0.74 | | (0.68 - 0.8) | |
| chiari_2 | Not included | | 0.73 | (0.68 - 0.79) | 0.70 | | (0.64 - 0.77) | |
| chronic_subdural_haematoma | 0.97 | (0.95 - 0.99) | 0.69 | (0.65 - 0.73) | 0.83 | | (0.79 - 0.86) | |
| cochlear_implant | 1.00 | (1 - 1) | 0.92 | (0.88 - 0.96) | 0.93 | | (0.86 - 1.01) | |
| colloid_cyst | 1.00 | (0.99 - 1) | 0.86 | (0.81 - 0.9) | 0.96 | | (0.92 - 0.99) | |
| colpocephaly | 0.99 | (0.98 - 0.99) | 0.77 | (0.73 - 0.82) | 0.78 | | (0.73 - 0.82) | |
| communicating_hydrocephalus | 0.97 | (0.97 - 0.98) | 0.72 | (0.69 - 0.76) | 0.77 | | (0.73 - 0.8) | |
| confluent_white_matter_hypodensities | 0.94 | (0.87 - 1) | 0.61 | (0.52 - 0.7) | 0.58 | | (0.51 - 0.66) | |
| cortical_laminar_necrosis | 0.95 | (0.93 - 0.97) | 0.60 | (0.55 - 0.65) | 0.58 | | (0.54 - 0.62) | |
| cortical_leptomeningeal_calcification | 0.95 | (0.88 - 0.98) | 0.68 | (0.62 - 0.73) | 0.67 | | (0.61 - 0.72) | |
| craniotomy | 0.99 | (0.99 - 0.99) | 0.92 | (0.9 - 0.93) | 0.95 | | (0.93 - 0.96) | |
| craniotomy_collection | 0.99 | (0.98 - 0.99) | 0.79 | (0.76 - 0.82) | 0.88 | | (0.86 - 0.9) | |
| dbs_electrodes | 1.00 | (1 - 1) | 0.97 | (0.95 - 0.99) | 0.99 | | (0.99 - 1) | |
| deep_white_gray_matter_infarct | 0.96 | (0.92 - 0.98) | 0.72 | (0.67 - 0.76) | 0.75 | | (0.69 - 0.8) | |
| deep_white_matter_thinning | Not included | | 0.58 | (0.54 - 0.61) | 0.56 | | (0.52 - 0.6) | |
| demyelination | 0.84 | (0.7 - 0.95) | 0.57 | (0.5 - 0.65) | 0.54 | | (0.49 - 0.58) | |
| diffuse_axonal_injury | Not included | | 0.73 | (0.67 - 0.79) | 0.68 | | (0.62 - 0.74) | |
| dilated_superior_opthalmic_vein | 0.78 | (0.68 - 0.87) | 0.61 | (0.56 - 0.67) | 0.63 | | (0.57 - 0.69) | |
| dural_calcification | 0.94 | (0.92 - 0.96) | 0.59 | (0.57 - 0.62) | 0.70 | | (0.66 - 0.73) | |
| dural_venous_gas | Not included | | 0.65 | (0.58 - 0.71) | 0.62 | | (0.57 - 0.67) | |
| duret_haemorrhage | Not included | | 0.68 | (0.62 - 0.74) | 0.63 | | (0.57 - 0.69) | |
| empty_sella | 0.96 | (0.94 - 0.97) | 0.73 | (0.7 - 0.76) | 0.84 | | (0.81 - 0.87) | |
| encephalitis | Not included | | 0.53 | (0.5 - 0.56) | 0.53 | | (0.51 - 0.55) | |
| encephalomalacia | 0.96 | (0.95 - 0.96) | 0.77 | (0.75 - 0.79) | 0.85 | | (0.84 - 0.87) | |
| entrapment_fourth_ventricle | Not included | | 0.58 | (0.53 - 0.62) | 0.55 | | (0.52 - 0.58) | |
| entrapment_lateral_ventricle | 0.98 | (0.97 - 0.99) | 0.60 | (0.55 - 0.64) | 0.64 | | (0.59 - 0.69) | |
| evd | 0.99 | (0.99 - 1) | 0.78 | (0.73 - 0.83) | 0.82 | | (0.77 - 0.87) | |
| exophthalmos | 0.98 | (0.97 - 0.99) | 0.64 | (0.6 - 0.68) | 0.64 | | (0.6 - 0.69) | |
| expanded_pituitary_fossa | 0.98 | (0.97 - 0.99) | 0.74 | (0.7 - 0.78) | 0.83 | | (0.79 - 0.86) | |
| extra_axial_collection_air | 0.94 | (0.91 - 0.96) | 0.83 | (0.8 - 0.86) | 0.88 | | (0.86 - 0.91) | |
| extra_axial_collection_csf | 0.96 | (0.94 - 0.97) | 0.69 | (0.66 - 0.72) | 0.79 | | (0.76 - 0.82) | |
| extra_axial_empyema | Not included | | 0.61 | (0.53 - 0.69) | 0.59 | | (0.53 - 0.65) | |
| extra_axial_mass_calcific_density_non_aggressive | 0.94 | (0.92 - 0.96) | 0.75 | (0.71 - 0.79) | 0.81 | | (0.77 - 0.85) | |
| extra_axial_mass_fat_density_non_aggressive | 0.74 | (0.63 - 0.85) | 0.72 | (0.64 - 0.79) | 0.70 | | (0.62 - 0.78) | |
| extra_axial_mass_soft_tissue_density_aggressive | 0.96 | (0.92 - 0.98) | 0.66 | (0.62 - 0.7) | 0.75 | | (0.7 - 0.8) | |
| extra_axial_mass_soft_tissue_density_non_aggressive | 0.84 | (0.77 - 0.89) | 0.58 | (0.55 - 0.62) | 0.64 | | (0.59 - 0.68) | |
| extracranial_herniation | 0.96 | (0.93 - 0.98) | 0.76 | (0.7 - 0.81) | 0.75 | | (0.68 - 0.81) | |
| extradural_haematoma | 0.94 | (0.89 - 0.97) | 0.72 | (0.66 - 0.78) | 0.67 | | (0.61 - 0.73) | |
| extraocular_muscle_enlargement | 0.93 | (0.88 - 0.97) | 0.70 | (0.66 - 0.74) | 0.78 | | (0.72 - 0.83) | |
| facial_bone_fracture | 0.90 | (0.87 - 0.94) | 0.79 | (0.76 - 0.83) | 0.83 | | (0.8 - 0.86) | |
| facial_bony_destruction | 0.94 | (0.9 - 0.97) | 0.69 | (0.64 - 0.73) | 0.77 | | (0.73 - 0.81) | |
| fibrous_dysplasia | 0.79 | (0.7 - 0.88) | 0.67 | (0.62 - 0.71) | 0.65 | | (0.6 - 0.7) | |
| focal_calcification | 0.92 | (0.88 - 0.95) | 0.65 | (0.62 - 0.68) | 0.80 | | (0.77 - 0.84) | |
| foreign_body_intracranial | Not included | | 0.78 | (0.72 - 0.84) | 0.79 | | (0.73 - 0.85) | |
| foreign_body_neck | 0.84 | (0.75 - 0.92) | 0.61 | (0.57 - 0.65) | 0.64 | | (0.59 - 0.69) | |
| foreign_body_orbit | 0.93 | (0.89 - 0.96) | 0.72 | (0.67 - 0.76) | 0.76 | | (0.7 - 0.81) | |
| foreign_body_scalp | 0.84 | (0.77 - 0.9) | 0.62 | (0.58 - 0.65) | 0.67 | | (0.63 - 0.72) | |
| fourth_ventricular_effacement | 0.98 | (0.97 - 0.99) | 0.69 | (0.64 - 0.73) | 0.85 | | (0.81 - 0.89) | |
| fracture_c1_2 | Not included | | 0.62 | (0.54 - 0.69) | 0.57 | | (0.52 - 0.62) | |
| fracture_calvarial | 0.94 | (0.9 - 0.98) | 0.73 | (0.69 - 0.78) | 0.82 | | (0.76 - 0.87) | |
| fracture_skull_base | 0.92 | (0.85 - 0.97) | 0.62 | (0.58 - 0.66) | 0.68 | | (0.63 - 0.74) | |
| fungal_sinusitis | 0.97 | (0.96 - 0.98) | 0.70 | (0.67 - 0.74) | 0.81 | | (0.78 - 0.84) | |
| globe_shape_abnormality | 0.93 | (0.89 - 0.96) | 0.69 | (0.65 - 0.73) | 0.80 | | (0.76 - 0.84) | |
| globus_pallidus_hypodensity |  | Not included | 0.73 | (0.65 - 0.8) | 0.69 | | (0.62 - 0.77) | |
| haemorrhagic_contusion | 0.98 | (0.96 - 0.99) | 0.74 | (0.7 - 0.78) | 0.87 | | (0.84 - 0.9) | |
| heterotopia | Not included | | 0.64 | (0.58 - 0.69) | 0.63 | | (0.57 - 0.69) | |
| hyperdense_artery | 0.96 | (0.94 - 0.98) | 0.57 | (0.54 - 0.61) | 0.72 | | (0.65 - 0.79) | |
| hyperostosis_frontalis | 0.99 | (0.98 - 0.99) | 0.67 | (0.63 - 0.7) | 0.80 | | (0.76 - 0.83) | |
| hypodense_basal_ganglia | 0.96 | (0.91 - 0.98) | 0.57 | (0.53 - 0.61) | 0.73 | | (0.67 - 0.8) | |
| hypopneumatised_mastoid | 0.97 | (0.95 - 0.98) | 0.73 | (0.69 - 0.77) | 0.76 | | (0.73 - 0.8) | |
| hypoxic_ischaemic_encephalopathy | 0.98 | (0.97 - 0.99) | 0.82 | (0.76 - 0.87) | 0.81 | | (0.75 - 0.87) | |
| insular_ribbon_sign | 0.96 | (0.95 - 0.98) | 0.55 | (0.53 - 0.57) | 0.72 | | (0.68 - 0.77) | |
| intra_ocular_silicone | 1.00 | (1 - 1) | 0.89 | (0.85 - 0.93) | 0.91 | | (0.88 - 0.95) | |
| intraaxial_lesion_calcification | 0.96 | (0.94 - 0.98) | 0.70 | (0.64 - 0.76) | 0.77 | | (0.7 - 0.84) | |
| intraaxial_lesion_complex_cyst | 0.95 | (0.9 - 0.98) | 0.71 | (0.65 - 0.77) | 0.78 | | (0.72 - 0.84) | |
| intraaxial_lesion_csf_cyst | 0.82 | (0.62 - 0.99) | 0.66 | (0.54 - 0.78) | 0.60 | | (0.49 - 0.72) | |
| intraaxial_lesion_haemorrhage | 0.97 | (0.95 - 0.98) | 0.70 | (0.66 - 0.75) | 0.81 | | (0.76 - 0.86) | |
| intraaxial_lesion_hyperdense | 0.96 | (0.94 - 0.97) | 0.69 | (0.65 - 0.73) | 0.74 | | (0.7 - 0.79) | |
| intraaxial_lesion_hypodense | 0.90 | (0.82 - 0.96) | 0.57 | (0.54 - 0.6) | 0.67 | | (0.62 - 0.73) | |
| intraaxial_lesion_isodense | 0.91 | (0.86 - 0.96) | 0.58 | (0.54 - 0.61) | 0.66 | | (0.61 - 0.7) | |
| intraaxial_lesion_mixed | 0.97 | (0.96 - 0.98) | 0.67 | (0.63 - 0.71) | 0.79 | | (0.75 - 0.84) | |
| intraventricular_debris | Not included | | 0.50 | (0.49 - 0.51) | 0.50 | | (0.5 - 0.5) | |
| intraventricular_haemorrhage | 0.99 | (0.98 - 1) | 0.81 | (0.77 - 0.85) | 0.92 | | (0.89 - 0.94) | |
| lacunar_infarct | 0.92 | (0.9 - 0.93) | 0.69 | (0.66 - 0.71) | 0.77 | | (0.75 - 0.79) | |
| lateral_ventricular_effacement | 0.98 | (0.97 - 0.98) | 0.75 | (0.72 - 0.77) | 0.88 | | (0.86 - 0.9) | |
| lytic_lesion_skull_base | 0.90 | (0.85 - 0.93) | 0.68 | (0.64 - 0.71) | 0.74 | | (0.7 - 0.78) | |
| lytic_spine_lesion | Not included | | 0.62 | (0.58 - 0.66) | 0.59 | | (0.56 - 0.63) | |
| mastoid_opacity | 0.91 | (0.89 - 0.92) | 0.73 | (0.71 - 0.76) | 0.78 | | (0.76 - 0.8) | |
| mastoidectomy | 0.99 | (0.97 - 1) | 0.80 | (0.76 - 0.85) | 0.94 | | (0.91 - 0.96) | |
| meningioma_with_hyperostosis | 0.96 | (0.93 - 0.98) | 0.61 | (0.57 - 0.65) | 0.60 | | (0.56 - 0.65) | |
| metallic_artefact | 0.97 | (0.96 - 0.98) | 0.77 | (0.74 - 0.8) | 0.83 | | (0.81 - 0.86) | |
| midline_shift | 0.98 | (0.97 - 0.99) | 0.75 | (0.72 - 0.78) | 0.91 | | (0.89 - 0.93) | |
| movement_artefact | 0.91 | (0.87 - 0.94) | 0.69 | (0.66 - 0.73) | 0.71 | | (0.68 - 0.75) | |
| mucocoele | 0.97 | (0.94 - 0.99) | 0.67 | (0.62 - 0.73) | 0.66 | | (0.6 - 0.72) | |
| mucosal_thickening | 0.90 | (0.89 - 0.91) | 0.79 | (0.77 - 0.8) | 0.78 | | (0.77 - 0.8) | |
| neck_haematoma | 0.96 | (0.94 - 0.97) | 0.75 | (0.72 - 0.78) | 0.85 | | (0.82 - 0.88) | |
| non_aggressive_bone_lesion | 0.74 | (0.68 - 0.79) | 0.60 | (0.57 - 0.63) | 0.57 | | (0.55 - 0.59) | |
| non_aggressive_skin_lesion | 0.86 | (0.81 - 0.91) | 0.69 | (0.65 - 0.72) | 0.70 | | (0.66 - 0.73) | |
| non_haemorrhagic_contusion | Not included | | 0.62 | (0.57 - 0.67) | 0.59 | | (0.55 - 0.63) | |
| obstructive_hydrocephalus | 0.98 | (0.97 - 0.99) | 0.63 | (0.6 - 0.66) | 0.80 | | (0.76 - 0.84) | |
| optic_neuritis | Not included | | 0.55 | (0.5 - 0.6) | 0.55 | | (0.51 - 0.58) | |
| orbital_abscess | Not included | | 0.59 | (0.53 - 0.65) | 0.57 | | (0.5 - 0.63) | |
| orbital_fat_stranding | 0.95 | (0.92 - 0.97) | 0.66 | (0.63 - 0.7) | 0.75 | | (0.7 - 0.8) | |
| orbital_mass | 0.88 | (0.82 - 0.93) | 0.68 | (0.63 - 0.73) | 0.71 | | (0.65 - 0.77) | |
| orbital_prosthesis | 1.00 | (0.99 - 1) | 0.92 | (0.89 - 0.95) | 0.96 | | (0.93 - 0.98) | |
| ossicular_chain_disruption | Not included | | 0.57 | (0.52 - 0.62) | 0.54 | | (0.5 - 0.57) | |
| osteoma | 0.83 | (0.77 - 0.89) | 0.64 | (0.61 - 0.67) | 0.69 | | (0.65 - 0.73) | |
| otic_capsule_trauma | Not included | | 0.60 | (0.52 - 0.67) | 0.58 | | (0.53 - 0.62) | |
| otosclerosis | Not included | | 0.57 | (0.5 - 0.64) | 0.53 | | (0.5 - 0.55) | |
| papilloedema | Not included | | 0.57 | (0.54 - 0.61) | 0.57 | | (0.53 - 0.61) | |
| parotid_lesion | 0.80 | (0.72 - 0.87) | 0.64 | (0.6 - 0.68) | 0.63 | | (0.59 - 0.67) | |
| periapical_abscess | Not included | | 0.59 | (0.56 - 0.62) | 0.57 | | (0.54 - 0.6) | |
| perimesencephalic_aneurysmal_subarachnoid_haemorrhage | 0.99 | (0.98 - 1) | 0.71 | (0.67 - 0.76) | 0.83 | | (0.79 - 0.88) | |
| peripheral_acute_infarct | 0.89 | (0.85 - 0.92) | 0.51 | (0.5 - 0.52) | 0.51 | | (0.5 - 0.52) | |
| perivascular_spaces | 0.88 | (0.86 - 0.9) | 0.59 | (0.57 - 0.61) | 0.60 | | (0.58 - 0.63) | |
| petrous_apex_lesion | Not included | | 0.58 | (0.54 - 0.61) | 0.57 | | (0.54 - 0.6) | |
| petrous_bone_fracture | 0.96 | (0.93 - 0.98) | 0.76 | (0.71 - 0.8) | 0.84 | | (0.79 - 0.88) | |
| pineal_mass | 0.81 | (0.7 - 0.9) | 0.63 | (0.56 - 0.69) | 0.65 | | (0.58 - 0.73) | |
| pseudo_sah | Not included | | 0.75 | (0.68 - 0.81) | 0.78 | | (0.72 - 0.85) | |
| resection_cavity | 0.98 | (0.97 - 0.99) | 0.69 | (0.65 - 0.72) | 0.73 | | (0.69 - 0.77) | |
| ruptured_dermoid | Not included | | 0.57 | (0.53 - 0.6) | 0.56 | | (0.51 - 0.6) | |
| scalp_haematoma | 0.96 | (0.94 - 0.97) | 0.72 | (0.7 - 0.75) | 0.82 | | (0.8 - 0.84) | |
| schizencephaly | Not included | | 0.77 | (0.67 - 0.86) | 0.76 | | (0.67 - 0.85) | |
| scleral_thickening | Not included | | 0.55 | (0.52 - 0.57) | 0.54 | | (0.52 - 0.56) | |
| sclerotic_spine_lesion | Not included | | 0.63 | (0.59 - 0.67) | 0.62 | | (0.57 - 0.67) | |
| sellar_haematoma | 0.88 | (0.79 - 0.95) | 0.74 | (0.69 - 0.78) | 0.76 | | (0.71 - 0.81) | |
| sellar_lesion | 0.96 | (0.93 - 0.98) | *0.78* | (0.74 - 0.82) | *0.85* | | (0.81 - 0.88) | |
| simple_pineal_cyst | 0.95 | (0.91 - 0.98) | 0.62 | (0.57 - 0.66) | 0.72 | | (0.67 - 0.77) | |
| sino_nasal_surgery | 0.87 | (0.85 - 0.9) | 0.63 | (0.61 - 0.66) | 0.74 | | (0.71 - 0.77) | |
| sinus_fluid_level | 0.94 | (0.93 - 0.95) | 0.77 | (0.74 - 0.79) | 0.85 | | (0.83 - 0.88) | |
| sinus_lesion | 0.92 | (0.88 - 0.95) | 0.67 | (0.64 - 0.71) | 0.73 | | (0.69 - 0.78) | |
| skin_abscess | Not included | | 0.67 | (0.61 - 0.73) | 0.61 | | (0.56 - 0.66) | |
| skull_vault_haemangioma | 0.80 | (0.75 - 0.84) | 0.61 | (0.58 - 0.65) | 0.58 | | (0.55 - 0.61) | |
| small_vessel_disease | 0.94 | (0.93 - 0.95) | 0.73 | (0.7 - 0.75) | 0.83 | | (0.82 - 0.85) | |
| soft_tissue_mass_neck | 0.87 | (0.81 - 0.93) | 0.66 | (0.62 - 0.7) | 0.71 | | (0.66 - 0.76) | |
| stapes_implants | Not included | | 0.68 | (0.62 - 0.73) | 0.69 | | (0.64 - 0.74) | |
| striatocapsular_slit_like_chronic_hemorrhage | 0.96 | (0.93 - 0.98) | 0.60 | (0.56 - 0.64) | 0.58 | | (0.54 - 0.61) | |
| subacute_intraparenchymal_haemorrhage | 0.93 | (0.9 - 0.96) | 0.62 | (0.58 - 0.66) | 0.62 | | (0.58 - 0.66) | |
| subacute_subdural_haematoma | 0.98 | (0.97 - 0.99) | 0.75 | (0.71 - 0.79) | 0.82 | | (0.78 - 0.86) | |
| subcutaneous_emphysema | 0.93 | (0.92 - 0.95) | 0.66 | (0.63 - 0.7) | 0.81 | | (0.78 - 0.84) | |
| subependymal_calcification | 0.89 | (0.84 - 0.93) | 0.70 | (0.66 - 0.74) | 0.69 | | (0.65 - 0.74) | |
| sulcal_effacement | 0.96 | (0.96 - 0.97) | 0.69 | (0.66 - 0.71) | 0.88 | | (0.86 - 0.89) | |
| third_ventricular_effacement | 0.98 | (0.98 - 0.99) | 0.71 | (0.67 - 0.74) | 0.83 | | (0.8 - 0.86) | |
| thornwaldt_cyst | Not included | | 0.52 | (0.51 - 0.54) | 0.52 | | (0.51 - 0.54) | |
| thyroid_eye_disease | Not included | | 0.74 | (0.68 - 0.81) | 0.72 | | (0.65 - 0.78) | |
| tmj_arthritis | 0.85 | (0.83 - 0.87) | 0.71 | (0.68 - 0.74) | 0.71 | | (0.68 - 0.74) | |
| tmj_dislocation | 0.96 | (0.93 - 0.98) | 0.73 | (0.69 - 0.77) | 0.69 | | (0.65 - 0.74) | |
| tonsillar_herniation | 0.99 | (0.98 - 0.99) | 0.65 | (0.6 - 0.7) | 0.83 | | (0.78 - 0.89) | |
| transependymal_oedema | 0.98 | (0.96 - 0.99) | 0.65 | (0.6 - 0.7) | 0.74 | | (0.68 - 0.81) | |
| transphenoidal_surgery | 0.96 | (0.93 - 0.99) | 0.78 | (0.73 - 0.84) | 0.81 | | (0.75 - 0.87) | |
| tympanic_cavity_erosion | 0.99 | (0.98 - 0.99) | 0.65 | (0.6 - 0.69) | 0.62 | | (0.57 - 0.66) | |
| tympanic_cavity_opacity | 0.99 | (0.97 - 1) | 0.76 | (0.73 - 0.8) | 0.90 | | (0.88 - 0.92) | |
| uncal_herniation | 0.99 | (0.99 - 1) | 0.70 | (0.65 - 0.74) | 0.89 | | (0.85 - 0.92) | |
| upwards_transtentorial_herniation | Not included | | 0.60 | (0.55 - 0.64) | 0.60 | | (0.55 - 0.65) | |
| vascular_clips | 0.98 | (0.97 - 0.99) | 0.80 | (0.76 - 0.85) | 0.87 | | (0.82 - 0.91) | |
| vascular_stents | Not included | | 0.73 | (0.68 - 0.79) | 0.72 | | (0.66 - 0.77) | |
| vasogenic_oedema | 0.98 | (0.97 - 0.98) | 0.81 | (0.79 - 0.84) | 0.91 | | (0.89 - 0.92) | |
| venous_infarct | Not included | | 0.61 | (0.55 - 0.66) | 0.59 | | (0.54 - 0.64) | |
| venous_thrombosis | Not included | | 0.61 | (0.56 - 0.67) | 0.60 | | (0.55 - 0.65) | |
| ventricular_cyst | 0.79 | (0.69 - 0.87) | 0.62 | (0.57 - 0.67) | 0.64 | | (0.59 - 0.68) | |
| ventricular_mass | 0.85 | (0.76 - 0.92) | 0.65 | (0.59 - 0.71) | 0.62 | | (0.57 - 0.67) | |
| vitreous_haemorrrhage | 0.97 | (0.94 - 0.99) | 0.85 | (0.8 - 0.9) | 0.87 | | (0.82 - 0.93) | |
| vp_shunt | 1.00 | (0.99 - 1) | 0.96 | (0.95 - 0.97) | 0.97 | | (0.95 - 0.98) | |
| watershed_acute_infarct | 0.92 | (0.88 - 0.94) | 0.57 | (0.55 - 0.6) | 0.68 | | (0.64 - 0.72) | |

Supplementary Table 2: Performance of the standalone model, unaided radiologists and aided radiologists reported as mean AUC for the 22 parent findings

|  | **Standalone  Model** | | | **Radiologist Unaided** | | | **Radiologist Aided** | | | | |
| --- | --- | --- | --- | --- | --- | --- | --- | --- | --- | --- | --- |
| **Finding (Leaf ID)** | **Mean AUC** | | **95% CI** | **Mean AUC** | | **95% CI** | | **Mean AUC** | **95% CI** |  |
| acute_infarction_in_the_brain | 0.91 | (0.9 - 0.93) | | 0.72 | (0.7 - 0.74) | | | 0.80 | (0.77 - 0.82) | | |
| aggressive_bone_lesion | 0.86 | (0.83 - 0.89) | | 0.76 | (0.74 - 0.79) | | | 0.77 | (0.74 - 0.79) | | |
| benign_bone_lesion | 0.70 | (0.67 - 0.74) | | 0.64 | (0.62 - 0.66) | | | 0.63 | (0.61 - 0.65) | | |
| cerebral_oedema | 0.95 | (0.94 - 0.97) | | 0.79 | (0.77 - 0.81) | | | 0.88 | (0.86 - 0.89) | | |
| extra_axial_air | 0.93 | (0.9 - 0.95) | | 0.83 | (0.79 - 0.85) | | | 0.87 | (0.85 - 0.9) | | |
| extra_axial_collection | 0.94 | (0.92 - 0.95) | | 0.84 | (0.81 - 0.86) | | | 0.92 | (0.9 - 0.93) | | |
| extra_axial_mass | 0.86 | (0.83 - 0.89) | | 0.72 | (0.69 - 0.74) | | | 0.77 | (0.74 - 0.8) | | |
| foreign_body | 0.84 | (0.79 - 0.88) | | 0.69 | (0.65 - 0.71) | | | 0.72 | (0.68 - 0.75) | | |
| fracture | 0.91 | (0.88 - 0.93) | | 0.78 | (0.75 - 0.81) | | | 0.84 | (0.81 - 0.86) | | |
| hyperdense_vessel | 0.82 | (0.77 - 0.87) | | 0.59 | (0.55 - 0.61) | | | 0.63 | (0.59 - 0.66) | | |
| intraaxial_haemorrhage | 0.91 | (0.89 - 0.93) | | 0.84 | (0.81 - 0.86) | | | 0.90 | (0.88 - 0.92) | | |
| intraaxial_mass | 0.97 | (0.96 - 0.98) | | 0.77 | (0.74 - 0.79) | | | 0.81 | (0.78 - 0.83) | | |
| intraventricular_haemorrhage_or_debris | 0.98 | (0.97 - 0.99) | | 0.81 | (0.77 - 0.84) | | | 0.91 | (0.88 - 0.93) | | |
| neck_mass_or_lesion | 0.78 | (0.73 - 0.83) | | 0.64 | (0.61 - 0.66) | | | 0.65 | (0.62 - 0.68) | | |
| orbital_lesion | 0.92 | (0.89 - 0.95) | | 0.72 | (0.68 - 0.75) | | | 0.76 | (0.71 - 0.79) | | |
| pineal_lesion | 0.88 | (0.83 - 0.92) | | 0.66 | (0.62 - 0.7) | | | 0.74 | (0.7 - 0.78) | | |
| sellar_lesion_or_haematoma | 0.93 | (0.9 - 0.96) | | 0.79 | (0.76 - 0.82) | | | 0.85 | (0.81 - 0.88) | | |
| skin_lesion | 0.85 | (0.82 - 0.89) | | 0.70 | (0.67 - 0.72) | | | 0.71 | (0.68 - 0.74) | | |
| subarachnoid_haemorrhage | 0.97 | (0.95 - 0.98) | | 0.78 | (0.74 - 0.8) | | | 0.89 | (0.86 - 0.91) | | |
| tonsillar_descent | 0.98 | (0.97 - 0.99) | | 0.67 | (0.63 - 0.7) | | | 0.79 | (0.74 - 0.82) | | |
| ventricular_effacement | 0.97 | (0.97 - 0.98) | | 0.74 | (0.72 - 0.76) | | | 0.88 | (0.86 - 0.9) | | |
| ventricular_entrapment | 0.93 | (0.89 - 0.96) | | 0.59 | (0.56 - 0.62) | | | 0.62 | (0.58 - 0.65) | | |

Supplementary Table 3: Child Ontology Tree Findings not included in the CTB model and reason for exclusion

| **Finding (Leaf ID)** | **Reason for exclusion as a Model Finding** |
| --- | --- |
| aggressive_lesion_jaw | Val AUC = 0.67 |
| aggressive_sclerotic_lesion_calvarial | Could not achieve precision of 0.2, Val AUC = 0.78 |
| atlanto-axial_subluxation | 14 Training cases, could not achieve precision of 0.2, Val AUC = 0.71 |
| atlanto-occipital_dissociation | 2 Training cases, 3 test cases, could not achieve precision of 0.2, Val AUC = 0.64 |
| basilar_thrombosis | 15 Test cases, could not achieve precision of 0.2 |
| benign_facial_bone_lesion | Could not achieve precision of 0.2, Val AUC = 0.66 |
| benign_soft_tissue_mass_neck | Could not achieve precision of 0.2, Val AUC = 0.59 |
| brainstem_atrophy | Excluded due to poor performance on clinical review |
| cerebellar_agenesis | Excluded due to poor performance on clinical review |
| chiari_2 | 17 Training cases, Could not achieve precision of 0.2 |
| deep_white_matter_thinning | 10 Training cases, 13 Test cases, Could not achieve precision of 0.2 |
| diffuse_axonal_injury | 34 Training cases |
| dural_venous_gas | 19 Training cases, 16 Test cases, Could not achieve precision of 0.2, Val AUC = 0.60 |
| duret_haemorrhage | 15 Training cases, 8 Test cases |
| encephalitis | Could not achieve precision of 0.2, Val AUC = 0.78 |
| enlarged_vestibular_acqueduct | 11 Training cases, 0 Test cases, Could not achieve precision of 0.2, Val AUC = 0.35 |
| entrapment_fourth_ventricle | 7 Training cases, 16 Test cases, Could not achieve precision of 0.2, Val AUC = 0.33 |
| extra_axial_empyema | 10 Training cases, 11 Test cases, Could not achieve precision of 0.2, Val AUC = 0.67 |
| foreign_body_intracranial | 15 Training cases, Could not achieve precision of 0.2, Val AUC = 0.63 |
| fracture_C1-2 | 9 Test cases |
| globus_pallidus_hypodensity | 9 Training cases, 13 Test cases, Could not achieve precision of 0.2, Val AUC = 0.65 |
| heterotopia | 17 Training cases, Could not achieve precision of 0.2, Val AUC = 0.63 |
| icp | 7 Training cases, 0 Test cases, Could not achieve precision of 0.2, Val AUC = 0.62 |
| intraventricular_debris | 3 Training cases, 4 Test cases, Could not achieve precision of 0.2, Val AUC = 0.796 |
| longus_colli_calcification | 0 Training cases, 1 Test cases, Could not achieve precision of 0.2, Cannot calculate validation AUC |
| lytic_spine_lesion | Could not achieve precision of 0.2, Val AUC 0.66 |
| non_haemorrhagic_contusion | Could not achieve precision of 0.2 |
| optic_neuritis | 18 Training cases, 5 Test cases, Could not achieve precision of 0.2, Val AUC = 0.69 |
| orbital_abscess | 2 Training cases, 8 Test cases, Could not achieve precision of 0.2, Val AUC = 0.73 |
| ossicular_chain_disruption | 9 Training cases, 6 Test cases, Could not achieve precision of 0.2, Val AUC = 0.49 |
| otic_capsule_trauma | 9 Training cases, 4 Test cases, Could not achieve precision of 0.2, Val AUC = 0.77 |
| otosclerosis | 11 Training cases, 9 Test cases, Could not achieve precision of 0.2, Val AUC = 0.48 |
| papilloedema | 41 Training cases, Could not achieve precision of 0.2, Val AUC = 0.59 |
| periapical_abscess | Could not achieve precision of 0.2, Val AUC = 0.78 |
| petrous_apex_lesion | Val AUC = 0.76 |
| pseudo_sah | 19 Training cases |
| ruptured_dermoid | 29 Training cases, 12 Test cases, Could not achieve precision of 0.2, Val AUC = 0.53 |
| schizencephaly | 15 Training cases, Could not achieve precision of 0.2, Val AUC = 0.60 |
| scleral_thickening | 35 Training cases, Could not achieve precision of 0.2, Val AUC = 0.74 |
| sclerotic_spine_lesion | Could not achieve precision of 0.2, Val AUC = 0.72 |
| skin_abscess | 28 Training cases, 19 Test cases, Could not achieve precision of 0.2, Val AUC = 0.66 |
| stapes_implants | Could not achieve precision of 0.2, Val AUC = 0.57 |
| thornwaldt_cyst | 22 Training cases, Could not achieve precision of 0.2, Val AUC = 0.47 |
| thyroid_eye_disease | Excluded due to poor performance on clinical review |
| upwards_transtentorial_herniation | 20 Training cases, Could not achieve precision of 0.2 |
| vascular_stents | Could not achieve precision of 0.2 |
| venous_infarct | 7 Training cases, 8 Test cases, Could not achieve precision of 0.2, Val AUC = 0.55 |
| venous_thrombosis | Could not achieve precision of 0.2, Val AUC = 0.70 |
| **Total Findings not included** | **48 child findings** |

Supplementary Table 4: Standalone Model Performance as Sensitivity, PPV, and MCC reported as the mean value for each of the 144 Child Findings included in the model

|  | ***Sensitivity*** | | | | ***PPV*** | | | | | | ***MCC*** | | | | | |
| --- | --- | --- | --- | --- | --- | --- | --- | --- | --- | --- | --- | --- | --- | --- | --- | --- |
|  |  | ***95% CI*** | | | | |  | ***95% CI*** | | | | |  | ***95% CI*** | | |
| **Finding (Leaf ID)** | ***Mean*** | | ***LL*** | ***UL*** | | ***Mean*** | | | ***LL*** | ***UL*** | | ***Mean*** | | | ***LL*** | ***UL*** | |
| *abnormal_prominent_vessels* | 0.000 | | 0.000 | 0.000 | | 0.000 | | | 0.000 | 0.000 | | -0.003 | | | -0.005 | -0.002 | |
| *acute_haemorrhagic_infarct* | 0.791 | | 0.611 | 0.947 | | 0.373 | | | 0.244 | 0.511 | | 0.536 | | | 0.398 | 0.661 | |
| *acute_infarct* | 0.810 | | 0.760 | 0.857 | | 0.485 | | | 0.437 | 0.533 | | 0.582 | | | 0.536 | 0.625 | |
| *acute_infarct_petechial* | 0.585 | | 0.432 | 0.735 | | 0.348 | | | 0.239 | 0.463 | | 0.440 | | | 0.322 | 0.551 | |
| *acute_intraparenchymal_haemorrhage* | 0.937 | | 0.882 | 0.980 | | 0.324 | | | 0.270 | 0.379 | | 0.528 | | | 0.474 | 0.579 | |
| *acute_lacunar_infarct* | 0.258 | | 0.169 | 0.353 | | 0.261 | | | 0.170 | 0.360 | | 0.236 | | | 0.149 | 0.325 | |
| *acute_on_chronic_subdural_haematoma* | 0.980 | | 0.932 | 1.000 | | 0.283 | | | 0.216 | 0.352 | | 0.513 | | | 0.446 | 0.577 | |
| *acute_subdural_haematoma* | 0.931 | | 0.884 | 0.971 | | 0.364 | | | 0.313 | 0.416 | | 0.554 | | | 0.505 | 0.600 | |
| *agenesis_corpus_callosum* | 0.568 | | 0.459 | 0.674 | | 0.920 | | | 0.837 | 0.982 | | 0.716 | | | 0.632 | 0.794 | |
| *aggressive_lytic_lesion_calvarial* | 0.578 | | 0.432 | 0.723 | | 0.367 | | | 0.256 | 0.479 | | 0.449 | | | 0.332 | 0.562 | |
| *aggressive_meningeal_thickening* | 0.026 | | 0.000 | 0.086 | | 0.255 | | | 0.000 | 1.000 | | 0.076 | | | -0.005 | 0.232 | |
| *aggressive_mixed_lesion_calvarial* | 0.000 | | 0.000 | 0.000 | | N/A | | | N/A | N/A | | N/A | | | N/A | N/A | |
| *aggressive_skin_lesion* | 0.420 | | 0.273 | 0.575 | | 0.430 | | | 0.282 | 0.585 | | 0.414 | | | 0.276 | 0.547 | |
| *aneurysm* | 0.407 | | 0.262 | 0.558 | | 0.163 | | | 0.096 | 0.237 | | 0.239 | | | 0.144 | 0.335 | |
| *aneurysm_coils* | 0.779 | | 0.650 | 0.897 | | 0.972 | | | 0.903 | 1.000 | | 0.868 | | | 0.786 | 0.938 | |
| *basal_cistern_effacement* | 0.816 | | 0.764 | 0.866 | | 0.656 | | | 0.599 | 0.711 | | 0.706 | | | 0.659 | 0.751 | |
| *basal_ganglia_calcification* | 0.641 | | 0.561 | 0.719 | | 0.690 | | | 0.608 | 0.769 | | 0.648 | | | 0.578 | 0.714 | |
| *beam_hardening_artefact* | 0.075 | | 0.045 | 0.108 | | 0.624 | | | 0.448 | 0.793 | | 0.193 | | | 0.123 | 0.261 | |
| *benign_meningeal_thickening* | 0.000 | | 0.000 | 0.000 | | N/A | | | N/A | N/A | | N/A | | | N/A | N/A | |
| *brainstem_infarct* | 0.189 | | 0.063 | 0.333 | | 0.106 | | | 0.035 | 0.195 | | 0.128 | | | 0.034 | 0.236 | |
| *calvarial_thickening* | 0.203 | | 0.095 | 0.320 | | 0.906 | | | 0.692 | 1.000 | | 0.421 | | | 0.273 | 0.550 | |
| *cavum_septum_pellucidum* | 0.115 | | 0.058 | 0.179 | | 1.000 | | | 1.000 | 1.000 | | 0.330 | | | 0.237 | 0.417 | |
| *cerebellar_atrophy* | 0.365 | | 0.301 | 0.429 | | 0.722 | | | 0.636 | 0.803 | | 0.487 | | | 0.419 | 0.552 | |
| *cerebellar_infarct* | 0.528 | | 0.396 | 0.660 | | 0.492 | | | 0.364 | 0.620 | | 0.499 | | | 0.378 | 0.608 | |
| *cerebral_atrophy* | 0.428 | | 0.376 | 0.480 | | 0.590 | | | 0.531 | 0.650 | | 0.443 | | | 0.390 | 0.494 | |
| *cerebral_convexity_subarachnoid_haemorrhage* | 0.934 | | 0.890 | 0.973 | | 0.269 | | | 0.229 | 0.308 | | 0.462 | | | 0.419 | 0.503 | |
| *chiari_1* | 0.293 | | 0.158 | 0.436 | | 0.444 | | | 0.258 | 0.636 | | 0.352 | | | 0.199 | 0.497 | |
| *chronic_subdural_haematoma* | 0.861 | | 0.772 | 0.939 | | 0.379 | | | 0.301 | 0.458 | | 0.557 | | | 0.480 | 0.628 | |
| *cochlear_implant* | 0.747 | | 0.000 | 1.000 | | 1.000 | | | 1.000 | 1.000 | | 0.869 | | | 0.577 | 1.000 | |
| *colloid_cyst* | 0.898 | | 0.793 | 0.977 | | 0.834 | | | 0.714 | 0.940 | | 0.863 | | | 0.774 | 0.935 | |
| *colpocephaly* | 0.333 | | 0.213 | 0.462 | | 0.826 | | | 0.652 | 0.962 | | 0.517 | | | 0.383 | 0.635 | |
| *communicating_hydrocephalus* | 0.609 | | 0.515 | 0.701 | | 0.615 | | | 0.523 | 0.704 | | 0.596 | | | 0.516 | 0.671 | |
| *confluent_white_matter_hypodensities* | 0.000 | | 0.000 | 0.000 | | N/A | | | N/A | N/A | | N/A | | | N/A | N/A | |
| *cortical_laminar_necrosis* | 0.000 | | 0.000 | 0.000 | | N/A | | | N/A | N/A | | N/A | | | N/A | N/A | |
| *cortical_leptomeningeal_calcification* | 0.088 | | 0.000 | 0.195 | | 0.497 | | | 0.000 | 1.000 | | 0.201 | | | -0.003 | 0.382 | |
| *craniotomy* | 0.894 | | 0.865 | 0.921 | | 0.928 | | | 0.903 | 0.951 | | 0.894 | | | 0.871 | 0.916 | |
| *craniotomy_collection* | 0.771 | | 0.700 | 0.838 | | 0.755 | | | 0.685 | 0.823 | | 0.750 | | | 0.691 | 0.804 | |
| *dbs_electrodes* | 0.971 | | 0.903 | 1.000 | | 1.000 | | | 1.000 | 1.000 | | 0.985 | | | 0.950 | 1.000 | |
| *deep_white_gray_matter_infarct* | 0.470 | | 0.333 | 0.610 | | 0.800 | | | 0.645 | 0.935 | | 0.606 | | | 0.476 | 0.723 | |
| *demyelination* | 0.000 | | 0.000 | 0.000 | | N/A | | | N/A | N/A | | N/A | | | N/A | N/A | |
| *dilated_superior_opthalmic_vein* | 0.000 | | 0.000 | 0.000 | | N/A | | | N/A | N/A | | N/A | | | N/A | N/A | |
| *dural_calcification* | 0.437 | | 0.352 | 0.524 | | 0.549 | | | 0.452 | 0.645 | | 0.468 | | | 0.385 | 0.547 | |
| *empty_sella* | 0.718 | | 0.650 | 0.785 | | 0.517 | | | 0.454 | 0.580 | | 0.580 | | | 0.521 | 0.636 | |
| *encephalomalacia* | 0.766 | | 0.731 | 0.800 | | 0.844 | | | 0.813 | 0.874 | | 0.756 | | | 0.725 | 0.786 | |
| *entrapment_lateral_ventricle* | 0.435 | | 0.278 | 0.595 | | 0.810 | | | 0.621 | 0.957 | | 0.587 | | | 0.430 | 0.721 | |
| *evd* | 0.502 | | 0.310 | 0.690 | | 0.468 | | | 0.286 | 0.652 | | 0.477 | | | 0.306 | 0.632 | |
| *exophthalmos* | 0.107 | | 0.025 | 0.204 | | 0.627 | | | 0.250 | 1.000 | | 0.250 | | | 0.083 | 0.402 | |
| *expanded_pituitary_fossa* | 0.573 | | 0.467 | 0.678 | | 0.681 | | | 0.568 | 0.788 | | 0.614 | | | 0.519 | 0.704 | |
| *extra_axial_collection_air* | 0.754 | | 0.680 | 0.825 | | 0.489 | | | 0.423 | 0.556 | | 0.582 | | | 0.520 | 0.642 | |
| *extra_axial_collection_csf* | 0.563 | | 0.493 | 0.633 | | 0.849 | | | 0.784 | 0.907 | | 0.673 | | | 0.613 | 0.728 | |
| *extra_axial_mass_calcific_density_non_aggressive* | 0.596 | | 0.490 | 0.699 | | 0.491 | | | 0.396 | 0.586 | | 0.524 | | | 0.433 | 0.608 | |
| *extra_axial_mass_fat_density_non_aggressive* | 0.000 | | 0.000 | 0.000 | | N/A | | | N/A | N/A | | N/A | | | N/A | N/A | |
| *extra_axial_mass_soft_tissue_density_aggressive* | 0.470 | | 0.333 | 0.610 | | 0.480 | | | 0.340 | 0.617 | | 0.464 | | | 0.337 | 0.581 | |
| *extra_axial_mass_soft_tissue_density_non_aggressive* | 0.341 | | 0.189 | 0.500 | | 0.191 | | | 0.100 | 0.288 | | 0.241 | | | 0.128 | 0.353 | |
| *extracranial_herniation* | 0.205 | | 0.075 | 0.351 | | 1.000 | | | 1.000 | 1.000 | | 0.444 | | | 0.276 | 0.590 | |
| *extradural_haematoma* | 0.069 | | 0.000 | 0.179 | | 0.402 | | | 0.000 | 1.000 | | 0.160 | | | -0.004 | 0.353 | |
| *extraocular_muscle_enlargement* | 0.511 | | 0.370 | 0.659 | | 0.407 | | | 0.283 | 0.534 | | 0.445 | | | 0.322 | 0.561 | |
| *facial_bone_fracture* | 0.586 | | 0.496 | 0.675 | | 0.694 | | | 0.600 | 0.784 | | 0.623 | | | 0.544 | 0.698 | |
| *facial_bony_destruction* | 0.449 | | 0.319 | 0.579 | | 0.565 | | | 0.422 | 0.711 | | 0.493 | | | 0.369 | 0.608 | |
| *fibrous_dysplasia* | 0.114 | | 0.025 | 0.229 | | 0.801 | | | 0.333 | 1.000 | | 0.293 | | | 0.101 | 0.457 | |
| *focal_calcification* | 0.775 | | 0.684 | 0.860 | | 0.288 | | | 0.232 | 0.347 | | 0.447 | | | 0.381 | 0.511 | |
| *foreign_body_neck* | 0.133 | | 0.031 | 0.250 | | 0.387 | | | 0.125 | 0.667 | | 0.218 | | | 0.057 | 0.379 | |
| *foreign_body_orbit* | 0.421 | | 0.263 | 0.583 | | 0.371 | | | 0.229 | 0.523 | | 0.385 | | | 0.244 | 0.519 | |
| *foreign_body_scalp* | 0.233 | | 0.127 | 0.350 | | 0.449 | | | 0.269 | 0.630 | | 0.312 | | | 0.180 | 0.441 | |
| *fourth_ventricular_effacement* | 0.805 | | 0.710 | 0.894 | | 0.468 | | | 0.382 | 0.556 | | 0.600 | | | 0.520 | 0.676 | |
| *fracture_calvarial* | 0.778 | | 0.646 | 0.895 | | 0.330 | | | 0.242 | 0.422 | | 0.494 | | | 0.398 | 0.582 | |
| *fracture_skull_base* | 0.468 | | 0.294 | 0.645 | | 0.366 | | | 0.222 | 0.515 | | 0.405 | | | 0.256 | 0.542 | |
| *fungal_sinusitis* | 0.668 | | 0.606 | 0.729 | | 0.706 | | | 0.644 | 0.767 | | 0.661 | | | 0.606 | 0.714 | |
| *globe_shape_abnormality* | 0.417 | | 0.300 | 0.538 | | 0.666 | | | 0.520 | 0.805 | | 0.517 | | | 0.398 | 0.627 | |
| *haemorrhagic_contusion* | 0.840 | | 0.754 | 0.917 | | 0.419 | | | 0.342 | 0.495 | | 0.577 | | | 0.503 | 0.644 | |
| *hyperdense_artery* | 0.667 | | 0.471 | 0.852 | | 0.160 | | | 0.093 | 0.237 | | 0.314 | | | 0.205 | 0.421 | |
| *hyperostosis_frontalis* | 0.630 | | 0.557 | 0.701 | | 0.910 | | | 0.856 | 0.958 | | 0.744 | | | 0.689 | 0.795 | |
| *hypodense_basal_ganglia* | 0.620 | | 0.429 | 0.794 | | 0.367 | | | 0.231 | 0.510 | | 0.468 | | | 0.323 | 0.600 | |
| *hypopneumatised_mastoid* | 0.416 | | 0.338 | 0.497 | | 0.834 | | | 0.742 | 0.915 | | 0.574 | | | 0.498 | 0.643 | |
| *hypoxic_ischaemic_encephalopathy* | 0.275 | | 0.143 | 0.421 | | 0.844 | | | 0.625 | 1.000 | | 0.475 | | | 0.310 | 0.621 | |
| *insular_ribbon_sign* | 0.572 | | 0.448 | 0.696 | | 0.461 | | | 0.350 | 0.571 | | 0.500 | | | 0.395 | 0.600 | |
| *intra_ocular_silicone* | 0.568 | | 0.406 | 0.727 | | 0.914 | | | 0.778 | 1.000 | | 0.715 | | | 0.585 | 0.826 | |
| *intraaxial_lesion_calcification* | 0.540 | | 0.333 | 0.741 | | 0.160 | | | 0.083 | 0.244 | | 0.282 | | | 0.161 | 0.397 | |
| *intraaxial_lesion_complex_cyst* | 0.685 | | 0.514 | 0.844 | | 0.209 | | | 0.131 | 0.288 | | 0.365 | | | 0.256 | 0.463 | |
| *intraaxial_lesion_csf_cyst* | 0.000 | | 0.000 | 0.000 | | 0.000 | | | 0.000 | 0.000 | | -0.001 | | | -0.002 | -0.001 | |
| *intraaxial_lesion_haemorrhage* | 0.872 | | 0.757 | 0.971 | | 0.180 | | | 0.127 | 0.236 | | 0.380 | | | 0.304 | 0.450 | |
| *intraaxial_lesion_hyperdense* | 0.591 | | 0.442 | 0.733 | | 0.187 | | | 0.124 | 0.252 | | 0.314 | | | 0.221 | 0.401 | |
| *intraaxial_lesion_hypodense* | 0.639 | | 0.444 | 0.826 | | 0.086 | | | 0.048 | 0.128 | | 0.217 | | | 0.135 | 0.296 | |
| *intraaxial_lesion_isodense* | 0.631 | | 0.440 | 0.810 | | 0.139 | | | 0.081 | 0.203 | | 0.282 | | | 0.183 | 0.375 | |
| *intraaxial_lesion_mixed* | 0.770 | | 0.644 | 0.886 | | 0.222 | | | 0.159 | 0.284 | | 0.396 | | | 0.313 | 0.472 | |
| *intraventricular_haemorrhage* | 0.949 | | 0.900 | 0.989 | | 0.452 | | | 0.384 | 0.520 | | 0.638 | | | 0.582 | 0.691 | |
| *lacunar_infarct* | 0.600 | | 0.553 | 0.647 | | 0.694 | | | 0.645 | 0.742 | | 0.588 | | | 0.544 | 0.631 | |
| *lateral_ventricular_effacement* | 0.807 | | 0.764 | 0.849 | | 0.780 | | | 0.736 | 0.824 | | 0.765 | | | 0.727 | 0.802 | |
| *lytic_lesion_skull_base* | 0.400 | | 0.293 | 0.511 | | 0.580 | | | 0.446 | 0.707 | | 0.468 | | | 0.358 | 0.570 | |
| *mastoid_opacity* | 0.429 | | 0.382 | 0.476 | | 0.904 | | | 0.862 | 0.942 | | 0.583 | | | 0.540 | 0.624 | |
| *mastoidectomy* | 0.920 | | 0.837 | 0.983 | | 0.978 | | | 0.927 | 1.000 | | 0.947 | | | 0.895 | 0.989 | |
| *meningioma_with_hyperostosis* | 0.086 | | 0.000 | 0.189 | | 0.605 | | | 0.000 | 1.000 | | 0.220 | | | -0.003 | 0.395 | |
| *metallic_artefact* | 0.605 | | 0.563 | 0.647 | | 0.948 | | | 0.923 | 0.970 | | 0.717 | | | 0.684 | 0.749 | |
| *midline_shift* | 0.962 | | 0.935 | 0.986 | | 0.389 | | | 0.349 | 0.431 | | 0.569 | | | 0.533 | 0.604 | |
| *movement_artefact* | 0.244 | | 0.171 | 0.320 | | 0.912 | | | 0.800 | 1.000 | | 0.460 | | | 0.374 | 0.540 | |
| *mucocoele* | 0.000 | | 0.000 | 0.000 | | N/A | | | N/A | N/A | | N/A | | | N/A | N/A | |
| *mucosal_thickening* | 0.419 | | 0.391 | 0.448 | | 0.927 | | | 0.904 | 0.949 | | 0.505 | | | 0.478 | 0.533 | |
| *neck_haematoma* | 0.720 | | 0.646 | 0.792 | | 0.720 | | | 0.645 | 0.793 | | 0.705 | | | 0.642 | 0.764 | |
| *non_aggressive_bone_lesion* | 0.022 | | 0.000 | 0.057 | | 0.334 | | | 0.000 | 0.800 | | 0.077 | | | -0.008 | 0.184 | |
| *non_aggressive_skin_lesion* | 0.243 | | 0.164 | 0.325 | | 0.788 | | | 0.639 | 0.923 | | 0.426 | | | 0.323 | 0.518 | |
| *obstructive_hydrocephalus* | 0.945 | | 0.894 | 0.988 | | 0.296 | | | 0.245 | 0.350 | | 0.506 | | | 0.453 | 0.556 | |
| *orbital_fat_stranding* | 0.379 | | 0.258 | 0.507 | | 0.564 | | | 0.406 | 0.718 | | 0.452 | | | 0.325 | 0.570 | |
| *orbital_mass* | 0.249 | | 0.119 | 0.390 | | 0.285 | | | 0.138 | 0.441 | | 0.255 | | | 0.120 | 0.388 | |
| *orbital_prosthesis* | 0.840 | | 0.731 | 0.938 | | 0.600 | | | 0.483 | 0.714 | | 0.703 | | | 0.608 | 0.791 | |
| *osteoma* | 0.316 | | 0.223 | 0.412 | | 0.789 | | | 0.647 | 0.917 | | 0.488 | | | 0.384 | 0.584 | |
| *parotid_lesion* | 0.085 | | 0.019 | 0.174 | | 0.802 | | | 0.333 | 1.000 | | 0.253 | | | 0.088 | 0.400 | |
| *perimesencephalic_aneurysmal_subarachnoid_haemorrhage* | 0.937 | | 0.869 | 0.986 | | 0.351 | | | 0.280 | 0.425 | | 0.559 | | | 0.490 | 0.624 | |
| *peripheral_acute_infarct* | 0.000 | | 0.000 | 0.000 | | N/A | | | N/A | N/A | | N/A | | | N/A | N/A | |
| *perivascular_spaces* | 0.149 | | 0.111 | 0.188 | | 0.806 | | | 0.702 | 0.898 | | 0.317 | | | 0.259 | 0.372 | |
| *petrous_bone_fracture* | 0.509 | | 0.377 | 0.638 | | 0.724 | | | 0.581 | 0.860 | | 0.599 | | | 0.479 | 0.708 | |
| *pineal_mass* | 0.273 | | 0.091 | 0.474 | | 0.094 | | | 0.029 | 0.171 | | 0.148 | | | 0.042 | 0.264 | |
| *resection_cavity* | 0.435 | | 0.329 | 0.539 | | 0.698 | | | 0.571 | 0.820 | | 0.540 | | | 0.436 | 0.634 | |
| *scalp_haematoma* | 0.732 | | 0.688 | 0.775 | | 0.745 | | | 0.702 | 0.787 | | 0.696 | | | 0.656 | 0.734 | |
| *sellar_haematoma* | 0.140 | | 0.045 | 0.250 | | 0.857 | | | 0.500 | 1.000 | | 0.337 | | | 0.166 | 0.483 | |
| *sellar_lesion* | 0.741 | | 0.644 | 0.831 | | 0.708 | | | 0.610 | 0.798 | | 0.715 | | | 0.634 | 0.788 | |
| *simple_pineal_cyst* | 0.281 | | 0.169 | 0.404 | | 0.889 | | | 0.714 | 1.000 | | 0.492 | | | 0.364 | 0.609 | |
| *sino_nasal_surgery* | 0.428 | | 0.356 | 0.500 | | 0.567 | | | 0.483 | 0.649 | | 0.461 | | | 0.390 | 0.528 | |
| *sinus_fluid_level* | 0.864 | | 0.824 | 0.901 | | 0.436 | | | 0.396 | 0.476 | | 0.552 | | | 0.513 | 0.589 | |
| *sinus_lesion* | 0.349 | | 0.231 | 0.469 | | 0.442 | | | 0.304 | 0.580 | | 0.379 | | | 0.259 | 0.492 | |
| *skull_vault_haemangioma* | 0.000 | | 0.000 | 0.000 | | N/A | | | N/A | N/A | | N/A | | | N/A | N/A | |
| *small_vessel_disease* | 0.790 | | 0.765 | 0.814 | | 0.826 | | | 0.802 | 0.848 | | 0.694 | | | 0.666 | 0.721 | |
| *soft_tissue_mass_neck* | 0.272 | | 0.159 | 0.393 | | 0.517 | | | 0.333 | 0.700 | | 0.365 | | | 0.228 | 0.494 | |
| *striatocapsular_slit_like_chronic_hemorrhage* | 0.026 | | 0.000 | 0.087 | | 1.000 | | | 1.000 | 1.000 | | 0.197 | | | 0.142 | 0.306 | |
| *subacute_intraparenchymal_haemorrhage* | 0.073 | | 0.000 | 0.167 | | 0.501 | | | 0.000 | 1.000 | | 0.184 | | | -0.004 | 0.353 | |
| *subacute_subdural_haematoma* | 0.744 | | 0.643 | 0.838 | | 0.417 | | | 0.336 | 0.500 | | 0.540 | | | 0.459 | 0.616 | |
| *subcutaneous_emphysema* | 0.600 | | 0.525 | 0.675 | | 0.524 | | | 0.453 | 0.594 | | 0.531 | | | 0.465 | 0.593 | |
| *subependymal_calcification* | 0.016 | | 0.000 | 0.054 | | 1.000 | | | 1.000 | 1.000 | | 0.151 | | | 0.112 | 0.238 | |
| *sulcal_effacement* | 0.957 | | 0.940 | 0.971 | | 0.593 | | | 0.564 | 0.622 | | 0.658 | | | 0.633 | 0.684 | |
| *third_ventricular_effacement* | 0.646 | | 0.564 | 0.729 | | 0.778 | | | 0.697 | 0.854 | | 0.696 | | | 0.627 | 0.761 | |
| *tmj_arthritis* | 0.204 | | 0.168 | 0.241 | | 0.794 | | | 0.720 | 0.863 | | 0.356 | | | 0.306 | 0.402 | |
| *tmj_dislocation* | 0.153 | | 0.057 | 0.265 | | 0.585 | | | 0.286 | 0.875 | | 0.291 | | | 0.128 | 0.442 | |
| *tonsillar_herniation* | 0.828 | | 0.690 | 0.944 | | 0.440 | | | 0.318 | 0.562 | | 0.596 | | | 0.481 | 0.697 | |
| *transependymal_oedema* | 0.608 | | 0.400 | 0.808 | | 0.350 | | | 0.204 | 0.511 | | 0.453 | | | 0.290 | 0.602 | |
| *transphenoidal_surgery* | 0.408 | | 0.237 | 0.583 | | 0.723 | | | 0.500 | 0.923 | | 0.536 | | | 0.358 | 0.691 | |
| *tympanic_cavity_erosion* | 0.000 | | 0.000 | 0.000 | | N/A | | | N/A | N/A | | N/A | | | N/A | N/A | |
| *tympanic_cavity_opacity* | 0.830 | | 0.772 | 0.884 | | 0.839 | | | 0.781 | 0.892 | | 0.824 | | | 0.776 | 0.867 | |
| *uncal_herniation* | 0.924 | | 0.855 | 0.984 | | 0.415 | | | 0.336 | 0.497 | | 0.607 | | | 0.535 | 0.674 | |
| *vascular_clips* | 0.661 | | 0.531 | 0.788 | | 0.555 | | | 0.429 | 0.680 | | 0.596 | | | 0.483 | 0.698 | |
| *vasogenic_oedema* | 0.966 | | 0.944 | 0.986 | | 0.467 | | | 0.428 | 0.507 | | 0.622 | | | 0.589 | 0.654 | |
| *ventricular_cyst* | 0.069 | | 0.000 | 0.179 | | 0.143 | | | 0.000 | 0.357 | | 0.092 | | | -0.007 | 0.234 | |
| *ventricular_mass* | 0.068 | | 0.000 | 0.176 | | 0.662 | | | 0.000 | 1.000 | | 0.209 | | | -0.003 | 0.398 | |
| *vitreous_haemorrrhage* | 0.480 | | 0.286 | 0.682 | | 0.463 | | | 0.267 | 0.667 | | 0.464 | | | 0.282 | 0.632 | |
| *vp_shunt* | 0.921 | | 0.881 | 0.957 | | 0.978 | | | 0.954 | 0.995 | | 0.945 | | | 0.920 | 0.968 | |
| *watershed_acute_infarct* | 0.445 | | 0.353 | 0.541 | | 0.612 | | | 0.507 | 0.717 | | 0.505 | | | 0.416 | 0.590 | |
